# Supplementary material for: The miR-17 Family Links p63 Protein to MAPK Signaling to Promote the Onset of Human Keratinocyte Differentiation
Source: PLoS One. 2012 Sep 24;7(9):e45761. doi: 10.1371/journal.pone.0045761 (PMC3454365; doi:10.1371/journal.pone.0045761)
Supplement: Table S1 — List of differentially expressed miRNAs in p63-knockdown HaCaT cells compared with control siRNA-treated cells. For each miRNA p-value and fold change are given. Each fold change is the average of three independent biological replicates (independent siRNA transfection and independent extraction of RNA). (XLS) [file pone.0045761.s003.xls]

## Sheet: heatmap.txt
MiRs	P value	Fold Change
hsa-miR-455-3p	0.00403	-0.546684
hsa-miR-20b	0.00446	-0.541012
hsa-miR-106a	0.00141	-0.513674
hsa-miR-18a	0.000451	-0.499077
hsa-miR-17	0.000899	-0.487714
hsa-miR-143	0.000212	-0.461866
hsa-miR-18b	0.00253	-0.448313
hsa-miR-92a	0.00563	-0.423658
hsa-miRPlus-F1181	0.000363	-0.418137
hsa-miR-205	0.000573	-0.401235
hsa-miR-92b	0.000257	-0.390933
hsa-miR-20b*	0.00377	-0.34734
hsa-miR-20a	0.000583	-0.345831
hsa-miR-30a	6.6e-05	-0.32643
hsa-miR-30d	0.00278	-0.263536
hsa-miR-98	0.0098	-0.263347
hsa-miR-28-5p	0.00712	-0.251958
hsa-miRPlus-F1017	0.000371	-0.249252
hsa-miR-196a*	0.000288	-0.237325
hsa-miR-30c	0.000619	-0.21095
hsa-miR-452	0.00102	-0.18886
hsa-miRPlus-E1030	0.0026	-0.178939
hsa-miRPlus-E1290	0.00846	-0.166084
hsa-let-7i	0.00422	-0.158473
hsa-miRPlus-E1246	0.00824	-0.150844
hsa-miR-600	0.0054	-0.120245
hsa-miR-200b	0.00684	0.144277
hsa-miRPlus-E1110	0.00772	0.146292
hsa-miR-24-1*	0.00298	0.175917
hsa-miR-146b-3p	0.00078	0.177724
hsa-miRPlus-E1146	0.00712	0.242385
hsa-miR-634	0.00503	0.249488
hsa-miR-574-3p	0.00363	0.251925
hsa-miR-765	0.00177	0.257508
hsa-miRPlus-E1012	0.0053	0.285417
hsa-miR-1299	0.00373	0.306396
hsa-miR-576-3p	0.00498	0.317335
hsa-miR-141	0.00639	0.342372
hsa-miR-32*	0.00299	0.346838
hsa-miR-138-1*	0.00124	0.347528
hsa-miRPlus-E1200	0.0017	0.383817
hsa-miRPlus-E1209	0.00946	0.394103
hsa-miRPlus-E1212	0.000526	0.402093
hsa-miR-574-5p	0.00291	0.403285
hsa-miR-1255a	0.00104	0.420345
hsa-miRPlus-F1232	0.000689	0.457794
hsa-miRPlus-E1189	0.00162	0.464807
hsa-miRPlus-E1078	0.00725	0.553281
